# Supplementary material
Source: PubMed Central journal article supplement (PMC2948804)
Supplement: mmc1.pdf [file mmc1.pdf]

Supplemental Data

Compound Heterozygosity for Loss-of-Function

Lysyl-tRNA Synthetase Mutations

in a Patient with Peripheral Neuropathy

Heather M. McLaughlin, Reiko Sakaguchi, Cuiping Liu, Takao Igarashi, Davut Pehlivan, Kristine Chu, Ram Iyer, Pedro Cruz, Praveen F. Cherukuri, Nancy F. Hansen, James C. Mullikin, NISC Comparative Sequencing Program, Leslie G. Biesecker, Thomas E. Wilson, Victor Ionasescu, Garth Nicholson, Charles Searby, Kevin Talbot, Jeffrey M. Vance, Stephan Züchner, Kinga Szigeti, James R. Lupski, Ya-Ming Hou, Eric D. Green, and Anthony Antonellis

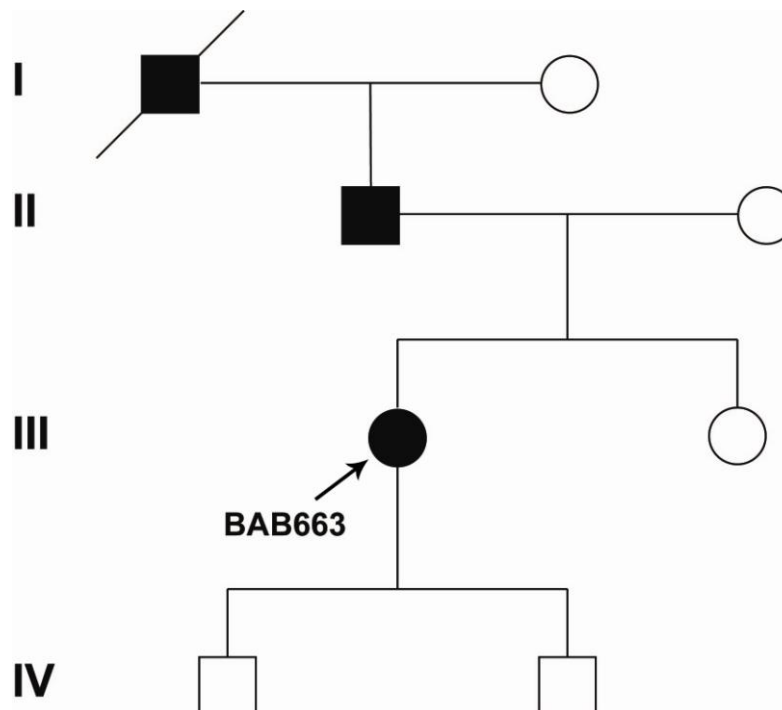

**Figure S1. Pedigree for the Family of Patient BAB663**

The female proband (BAB663) is indicated by a black arrow. Note the male-to-male transmission of the phenotype from generation I to generation II.
